# Supplementary material for: Development of classification criteria for hand osteoarthritis: comparative analyses of persons with and without hand osteoarthritis
Source: PubMed Central journal article supplement — RMD Open. 2020 Jun 25;6(2):e001265. doi: 10.1136/rmdopen-2020-001265 (PMC7425183; doi:10.1136/rmdopen-2020-001265), 2020-06-25
Supplement: rmdopen-2020-001265s001.pdf [file rmdopen-2020-001265s001.pdf]

**Online Supplementary Table 1:** Demographic/clinical variables and self-reported symptoms in patients with hand OA and controls.

|                                                             | <b>Hand OA</b> | <b>Controls</b> |
|-------------------------------------------------------------|----------------|-----------------|
|                                                             | <b>(n=128)</b> | <b>(n=70)</b>   |
| Family history of OA, n (%)*                                | 90 (70.9)      | 23 (32.9)       |
| Family history of bony swelling, n (%)*                     | 65 (51.6)      | 18 (25.7)       |
| Psoriasis, n (%)*                                           | 7 (5.6)        | 8 (11.8)        |
| Duration of morning stiffness:                              |                |                 |
| • Finger joints, median (IQR) minutes                       | 8 (0-30)       | 25 (2-60)       |
| • Thumb base joints, median (IQR) minutes                   | 0 (0-10)       | 0 (0-15)        |
| Number of painful joints on most days the previous 6 weeks: |                |                 |
| • DIP joints, median (IQR)                                  | 1 (0-4)        | 0 (0-1)         |
| • PIP joints, median (IQR)                                  | 1 (0-4)        | 1 (0-5)         |
| • MCP joints, median (IQR)                                  | 0 (0-2)        | 1 (0-4)         |
| • Thumb base joints, median (IQR)                           | 0 (0-2)        | 0 (0-1)         |
| Hand numbness, n (%)*                                       | 48 (37.8)      | 35 (50.7)       |
| Painful joints on most days the previous 6 weeks:           |                |                 |
| • Elbow(s), n (%)                                           | 20 (15.6)      | 22 (31.4)       |
| • Wrist(s), n (%)                                           | 33 (25.8)      | 38 (54.3)       |
| • Toes, n (%)                                               | 36 (28.1)      | 30 (42.9)       |

OA=osteoarthritis, DIP=distal interphalangeal, PIP=proximal interphalangeal, MCP=metacarpophalangeal. \* Missing information about family history of OA (n=1), family history of bony swelling (n=2), psoriasis (n=3), numbness (n=1) in the hand OA group. Missing information about psoriasis (n=2), numbness (n=1) in the control group

**Online Supplementary Table 2:** Number of patients (hand OA vs. controls) with clinical examination features in the hand and wrist.

|                                          | <b>Hand OA<br/>(n=128)</b> | <b>Controls<br/>(n=70)</b> |
|------------------------------------------|----------------------------|----------------------------|
| Any bony enlargement of hand joints:     |                            |                            |
| • DIP joint(s), n (%)                    | 99 (77.3)                  | 33 (47.1)                  |
| • PIP joint(s), n (%)                    | 81 (63.3)                  | 28 (40.0)                  |
| • MCP joint(s), n (%)                    | 26 (20.3)                  | 13 (18.6)                  |
| • Thumb base joint(s), n (%)             | 39 (30.5)                  | 10 (14.3)                  |
| Any pain on palpation of hand joints:    |                            |                            |
| • DIP joint(s), n (%)                    | 81 (63.3)                  | 28 (40.0)                  |
| • PIP joint(s), n (%)                    | 76 (59.4)                  | 37 (52.9)                  |
| • MCP joint(s), n (%)                    | 44 (34.4)                  | 39 (55.7)                  |
| • Thumb base joint(s), n (%)             | 60 (46.9)                  | 21 (30.0)                  |
| Any soft tissue swelling of hand joints: |                            |                            |
| • DIP joint(s), n (%)                    | 28 (21.9)                  | 8 (11.4)                   |
| • PIP joint(s), n (%)                    | 50 (39.1)                  | 22 (31.4)                  |
| • MCP joint(s), n (%)                    | 6 (4.7)                    | 25 (35.7)                  |
| • Thumb base joint(s), n (%)             | 5 (3.9)                    | 4 (5.7)                    |
| Any malalignment of hand joints:         |                            |                            |
| • DIP joint(s), n (%)                    | 52 (40.6)                  | 4 (5.7)                    |
| • PIP joint(s), n (%)                    | 24 (18.8)                  | 4 (5.7)                    |
| • Thumb base joint(s), n (%)             | 15 (11.7)                  | 1 (1.4)                    |
| Any pain on palpation in wrist(s), n (%) | 23 (18.0)                  | 24 (34.3)                  |

OA=osteoarthritis, DIP=distal interphalangeal, PIP=proximal interphalangeal, MCP=metacarpophalangeal.

**Online Supplementary Table 3:** Radiographic and laboratory features in patients with hand OA and controls.

|                                                           | <b>Hand OA</b><br><b>(n=128)*</b> | <b>Controls</b><br><b>(n=70)**</b> |
|-----------------------------------------------------------|-----------------------------------|------------------------------------|
| Number of joints with radiographic osteophytes:           |                                   |                                    |
| • DIP joints, median (IQR)                                | 5 (2-7)                           | 0 (0-2)                            |
| • PIP joints, median (IQR)                                | 4 (1-7)                           | 0 (0-2)                            |
| • MCP joints, median (IQR)                                | 0 (0-1)                           | 0 (0-0)                            |
| • CMC1 joints, median (IQR)                               | 1 (0-2)                           | 0 (0-1)                            |
| Number of joints with radiographic joint space narrowing: |                                   |                                    |
| • DIP joints, median (IQR)                                | 6 (1-8)                           | 0 (0-1)                            |
| • PIP joints, median (IQR)                                | 2 (0-6)                           | 0 (0-0)                            |
| • MCP joints, median (IQR)                                | 0 (0-0)                           | 0 (0-0)                            |
| • CMC1 joints, median (IQR)                               | 0 (0-2)                           | 0 (0-0)                            |
| Number of joints with radiographic central erosions:      |                                   |                                    |
| • DIP joints, median (IQR)                                | 1 (0-4)                           | 0 (0-0)                            |
| • PIP joints, median (IQR)                                | 0 (0-1)                           | 0 (0-0)                            |
| Any radiographic marginal erosions:                       |                                   |                                    |
| • PIP joints, n (%)                                       | 8 (7.3)                           | 5 (7.5)                            |
| • MCP joints, n (%)                                       | 5 (4.5)                           | 7 (10.4)                           |
| • Wrist bones, n (%)                                      | 3 (2.7)                           | 9 (13.4)                           |
| Laboratory tests:                                         |                                   |                                    |
| • CRP $\geq$ 5 mg/L, n (%)                                | 31 (25.8)                         | 30 (43.5)                          |
| • ESR $\geq$ 15 mm/hour, n (%)                            | 26 (26.5)                         | 30 (48.4)                          |
| • Positive anti-CCP, n (%)                                | 3 (4.9)                           | 14 (28.0)                          |

- Positive rheumatoid factor, n (%) 9 (14.8) 17 (33.3)
- 

OA=osteoarthritis, DIP=distal interphalangeal, PIP=proximal interphalangeal, MCP=metacarpophalangeal, CMC1=first carpometacarpal, JSN=joint space narrowing, CRP=C-reactive protein, ESR=erythrocyte sedimentation rate, CCP=cyclic citrullinated protein. \* Missing information about radiographic features (n=18), CRP (n=8), ESR (n=30), anti-CCP (n=67) and rheumatoid factor (n=67) in the hand OA group. \*\* Missing information about radiographic features (n=3 for fingers and wrists, and n=4 for CMC1 joints), CRP (n=1), ESR (n=8), anti-CCP (n=20) and rheumatoid factor (n=19) in the control group.
